# Supplementary material for: γ-FeO(OH) with multiple surface terminations: Intrinsically active for the electrocatalytic oxygen evolution reaction
Source: Royal Society of Chemistry journal article supplement (doi:10.1039/d2dt01860h), 2022-01-01
Supplement: d2dt01860h1.pdf [file d2dt01860h1.pdf]

**Electronic Supplementary File for:**

## **$\gamma$ -FeO(OH) with Multi-surface Terminations Intrinsically Active for Electrocatalytic Oxygen Evolution Reaction**

Laxmikanta Mallick,<sup>‡</sup> Anubha Rajput,<sup>‡</sup> Mrinal Kanti Adak, Avinava Kundu, Pratigya Choudhary  
Biswarup Chakraborty\*

Department of Chemistry, Indian Institute of Technology Delhi, Hauz Khas, 110016, New Delhi, India

**\*E-mail: [cbiswarup@chemistry.iitd.ac.in](mailto:cbiswarup@chemistry.iitd.ac.in)**

**<sup>‡</sup>These authors contributed equally to this work**

## **Characterization and Analysis Methods**

### **1.1. Powder X-ray diffraction (PXRD)**

The as-synthesized crystalline and amorphous  $\alpha$ - and  $\gamma$ -FeO(OH) were characterized by powder x-ray diffraction on Bruker D8 Advance X-ray diffractometer equipped with Cu K $\alpha$  (K $\alpha$ 1 = 1.540598 Å, K $\alpha$ 2 = 1.544426 Å, K $\alpha$  ratio 0.5, K $\alpha$ av = 1.541874Å) X-ray tubes.

### **1.2. Fourier Transform Infrared spectroscopy (FTIR)**

The FTIR of crystalline and amorphous  $\alpha$ - and  $\gamma$ -FeO(OH) was characterized by Nicolet, Protege 460 by making pellet. The pellet was made by mixing small amount of KBr with minute quantity of the sample

### **1.3. Raman spectroscopy**

Raman spectroscopy was analyzed by micro-Raman spectrometer model (Renishaw plc, Old Town, Wotton-under-Edge, Gloucestershire, GL 12 7 DW, United Kingdom), in which 514nm Argon laser was used.

### **1.4. Field Emission Scanning Electron Microscope (FESEM)**

The field emission scanning electron microscopy (FESEM), and the Energy-dispersive X-ray spectroscopy (EDX) techniques were used for mapping and elemental analysis was done by JSM-IT300HR, JEOL instrument.

### **1.5. High-resolution Transmission Electron Microscopy (HRTEM)**

The synthesized crystalline and amorphous  $\alpha$ - and  $\gamma$ -FeO(OH) were further characterized by high-resolution transmission electron microscopy (HRTEM). HRTEM images and selected area electron diffraction (SAED) patterns were performed using a Thermo Fischer Technik microscope working at accelerated voltage 200 kV. TEM grids for crystalline and amorphous  $\alpha$ - and  $\gamma$ -FeO(OH) were prepared on the 200-mesh carbon-coated Cu grids [TED PELLA, INC.] with the help of their respective dilute suspensions in HPLC grade acetone (Merck, India).

### **1.6. X-ray photoelectron spectroscopy (XPS)**

The X-ray photoelectron spectroscopy (XPS) measurements were conducted through omicron nanotechnology, Oxford Instrument Germany, equipped with an aluminum monochromator

with an aluminium source (Al K $\alpha$  radiation  $h\nu=1486.7\text{eV}$ ). The operational voltage and current of the instrument were at 15 kV and 15 mA.

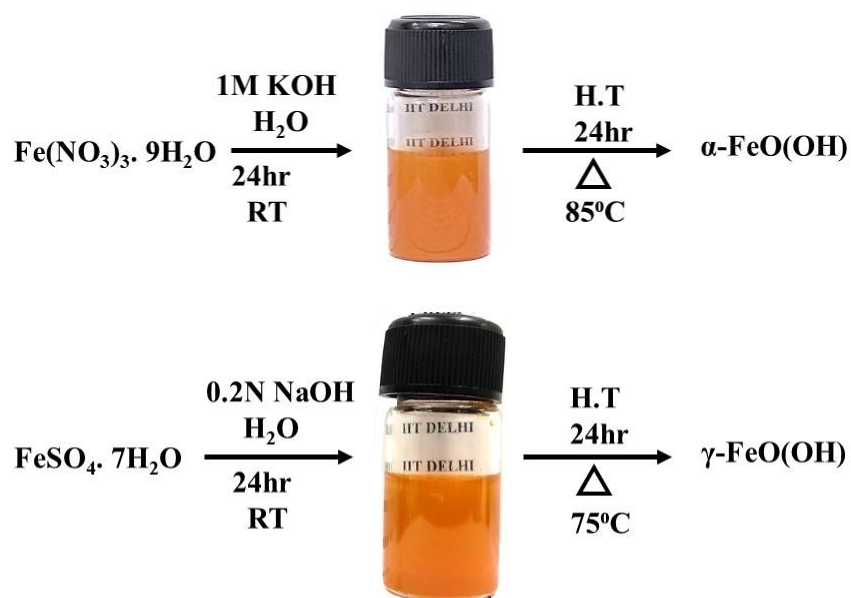

**Figure S1.** Preparation of  $\alpha\text{-FeO}(\text{OH})$  (top) and  $\gamma\text{-FeO}(\text{OH})$  (bottom) via hydrothermal route.

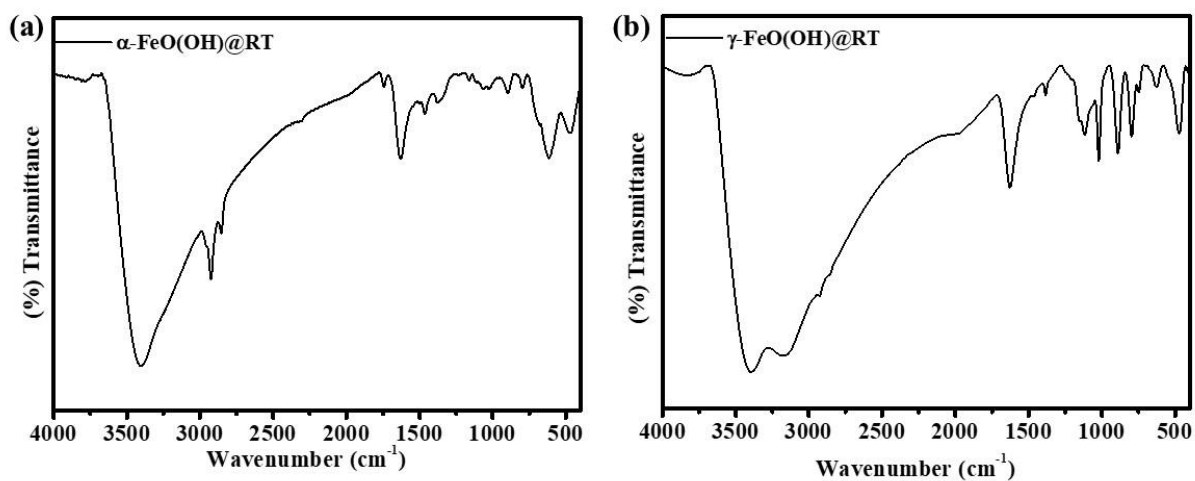

**Figure S2.** FTIR spectra of (a)  $\alpha\text{-FeO}(\text{OH})@RT$  and (b)  $\gamma\text{-FeO}(\text{OH})@RT$ .

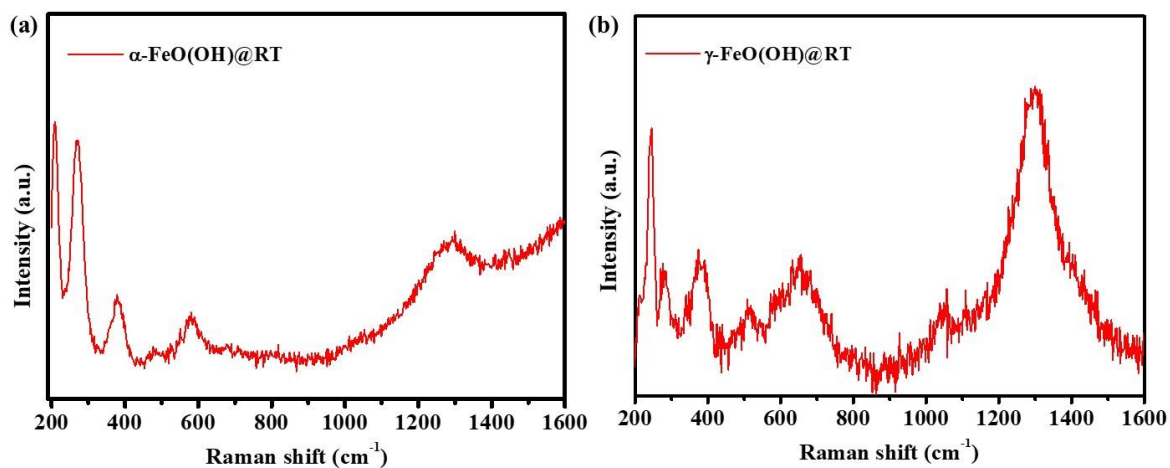

**Figure S3.** Raman spectra of (a)  $\alpha$ -FeO(OH)@RT and (b)  $\gamma$ -FeO(OH)@RT.

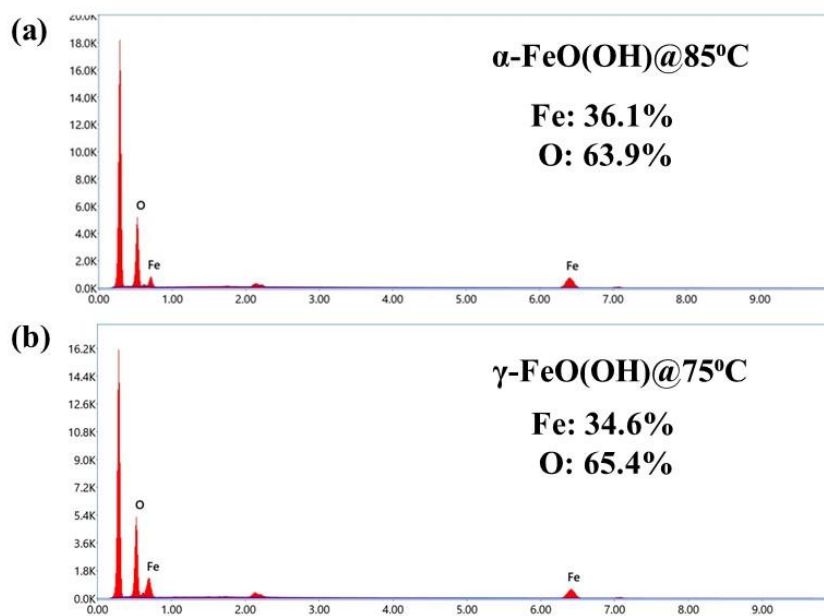

**Figure S4.** EDS spectra of the as-prepared (a)  $\alpha$ -FeO(OH)@85°C (b)  $\gamma$ -FeO(OH)@75°C. The atomic ratio of Fe and O atoms was 1:2.

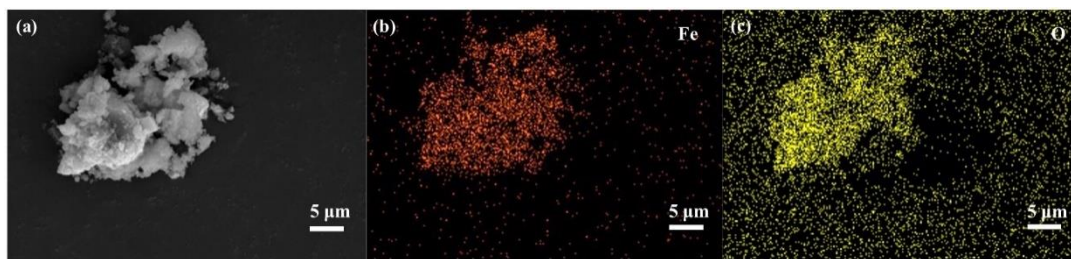

**Figure S5.** (a) FESEM image of  $\alpha$ -FeO(OH)@RT. Elemental mapping of (b) O-atom (c) Fe-atom.

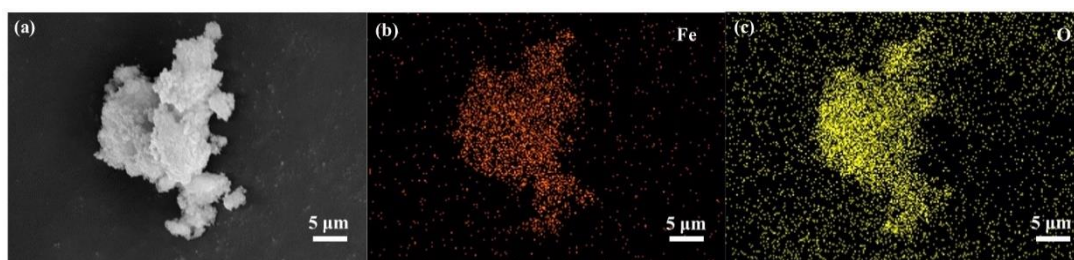

**Figure S6.** (a) FESEM image of  $\gamma$ -FeO(OH)@RT. Elemental Mapping of (b) O-atom (c) Fe-atom.

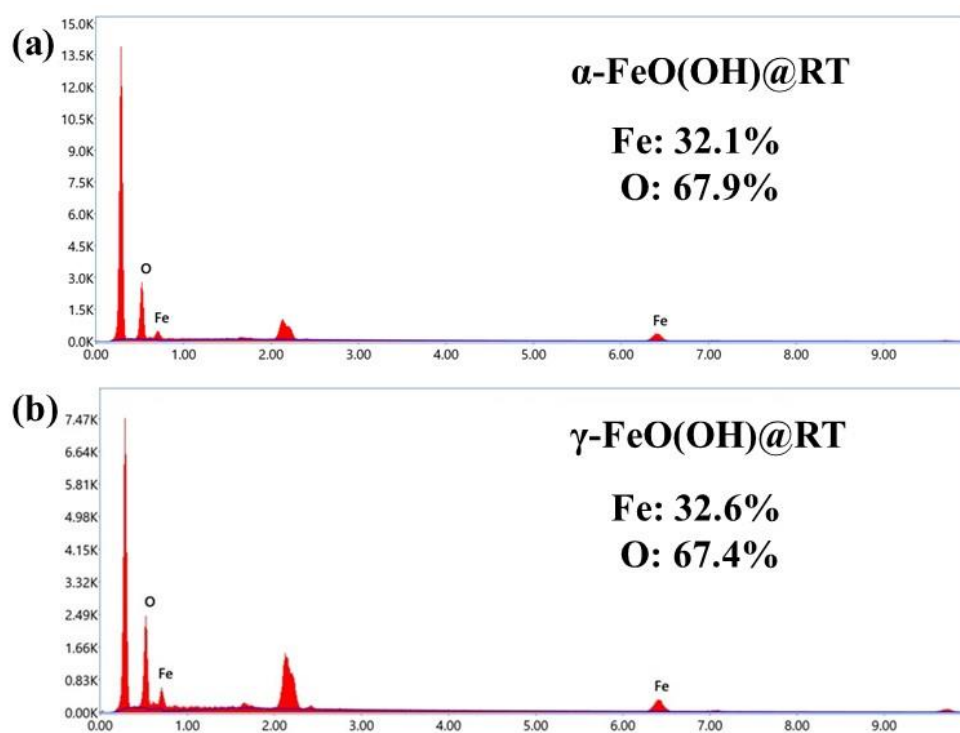

**Figure S7.** EDS spectra of the as-prepared (a)  $\alpha$ -FeO(OH)@RT (b)  $\gamma$ -FeO(OH)@RT. The atomic ratio of Fe and O atoms was 1:2.

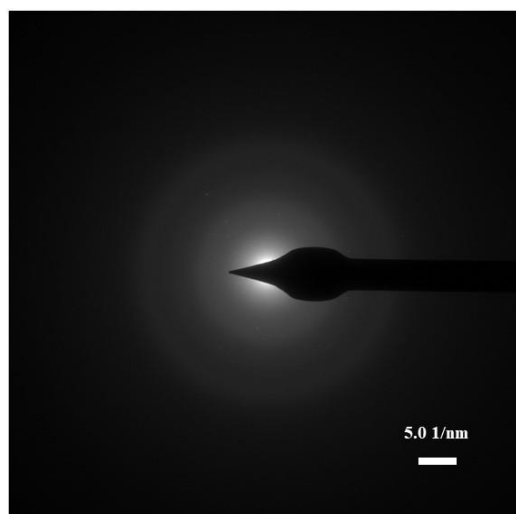

**Figure S8.** SAED pattern of amorphous  $\alpha$ -FeO(OH)@RT.

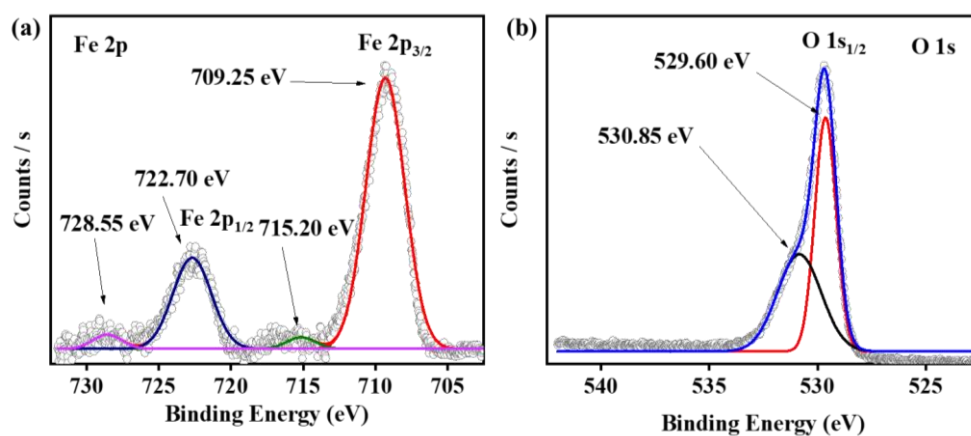

**Figure S9.** XPS study with  $\alpha$ -FeO(OH)@RT showing the high resolution (a) Fe 2p scan (b) O 1s scan.

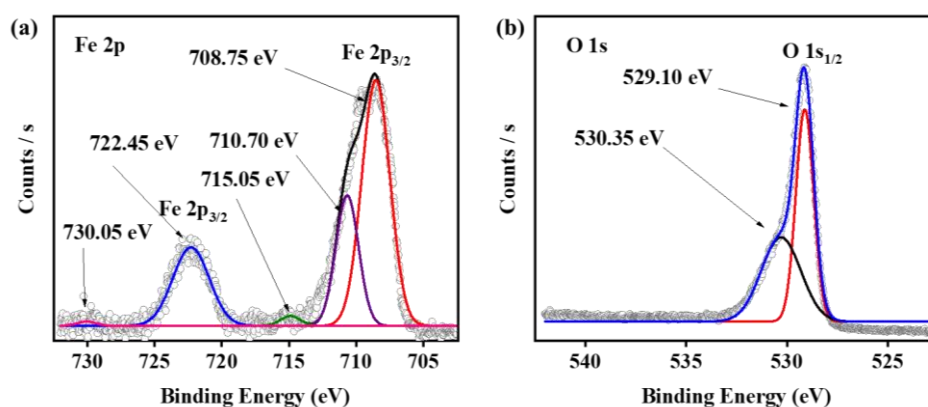

**Figure S10:** XPS study with  $\gamma$ -FeO(OH)@RT showing the high resolution (a) Fe 2p scan (b) O 1s scan.

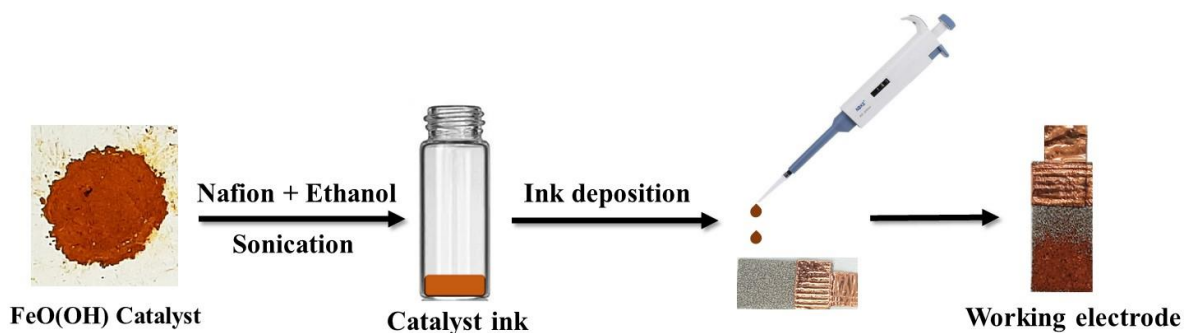

**Figure S11.** Preparation of electrode with FeO(OH) catalysts on NF electrode.

**Table S1.** Overpotentials ( $\eta$ ) recorded for OER study with FeO(OH) iron-based oxyhydroxide anodes reported earlier as the anode in 1 M KOH.

| Anode material                                | Substrate                                                        | $\eta$ (mV)@10 mA cm <sup>-2</sup> | Reference |
|-----------------------------------------------|------------------------------------------------------------------|------------------------------------|-----------|
| FeO(OH)                                       | NF                                                               | 428                                | 1         |
| FeO(OH)                                       | NF                                                               | 290                                | 2         |
| FeO(OH)(Se)                                   | IF                                                               | 287                                | 3         |
| Fe <sub>2</sub> O <sub>3</sub> /CNT           | GC                                                               | 383                                | 4         |
| $\gamma$ -Fe <sub>2</sub> O <sub>3</sub> -CNT | GC                                                               | 340                                | 5         |
| CNT/FeO(OH)                                   | CC                                                               | 250                                | 6         |
| FeO(OH) nanosheet                             | NF                                                               | 390                                | 7         |
| FeO(OH)                                       | NF                                                               | 280                                | 8         |
| NiFeOX                                        | GC                                                               | 350                                | 9         |
| Ni-FeO(OH)                                    | Fe-foil                                                          | 274                                | 1         |
| Co <sub>0.54</sub> Fe <sub>0.46</sub> O(OH)   | GC                                                               | 390                                | 10        |
| RGO/Ni-FeO(OH)                                | FTO                                                              | 260                                | 11        |
| FeO(OH)/CeO <sub>2</sub>                      | NF                                                               | 250                                | 12        |
| FeO(OH)@NG                                    | Fe <sub>78</sub> Si <sub>9</sub> B <sub>13</sub> amorphous alloy | 240                                | 13        |
| FeO(OH)/LDH                                   | GCDE                                                             | 174                                | 14        |
| Se doped FeO(OH)                              | NF                                                               | 348@500 mA cm <sup>-2</sup>        | 3         |
| NiCo <sub>2</sub> S <sub>4</sub> /FeO(OH)     | CC                                                               | 200                                | 15        |
| $\beta/\delta$ -FeO(OH)                       | NF                                                               | 180 mV                             | 16        |
| FeO(OH)@CNTs                                  | NF                                                               | 206                                | 17        |
| FeO(OH) powder                                | NF                                                               | 441                                | 17        |
| FeO(OH)/Co/FeO(OH)<br>) HNTAs                 | NF                                                               | 350                                | 18        |
| $\gamma$ -FeO(OH)                             | NF                                                               | 286                                | 19        |
| $\alpha$ -FeO(OH)                             | FTO                                                              | 620                                | 20        |
| FeO(OH)/Ni <sub>3</sub> N                     | CC                                                               | 244                                | 21        |
| $\delta$ -FeO(OH)                             | NF                                                               | 292                                | 16        |
| FeO(OH)                                       | IF                                                               | 428                                | 1         |
| $\delta$ -FeO(OH)                             | NF                                                               | 290                                | 22        |
| F-modified $\beta$ -FeO(OH)                   |                                                                  | 360                                | 23        |

Abbreviations: NF = Nickel Foam; CC = Carbon Cloth; GC = Glassy Carbon electrode; IF = Iron Foam; CP = Carbon fibre Paper; SS = Stainless Steel; FTO = Fluorine doped Tin Oxide; NC = N-doped Carbon; GCDE = glassy carbon disk electrode

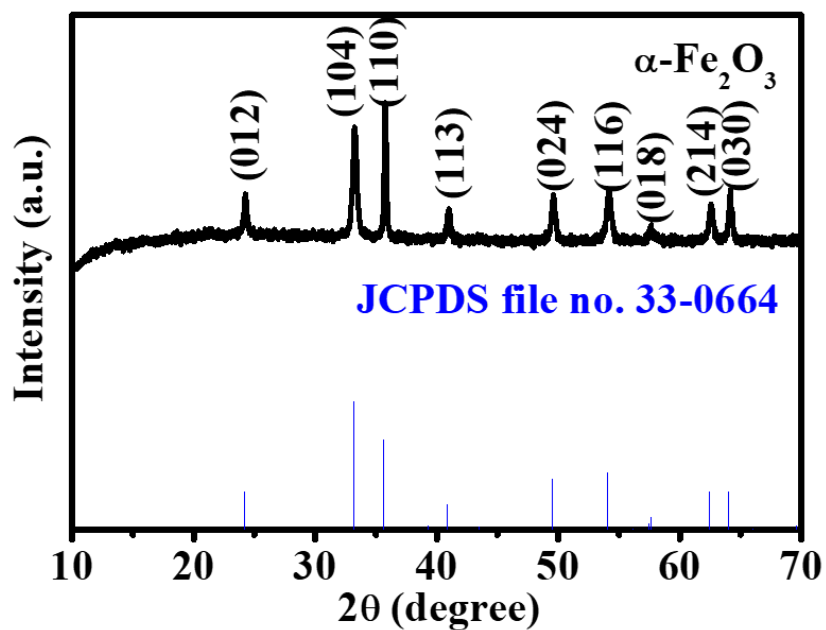

**Figure S12.** Powder X-ray diffraction spectrum of  $\alpha\text{-Fe}_2\text{O}_3$  (black curve) prepared herein and indexing of the reflections to the JCPDS 33-0664 (blue bars).

**Table S2.** Mass loading of the iron materials on NF.

| Material                                 | Mass loading (mg) |
|------------------------------------------|-------------------|
| $\gamma\text{-FeO(OH)@RT}$               | 7.4               |
| $\gamma\text{-FeO(OH)@50}^\circ\text{C}$ | 5.8               |
| $\gamma\text{-FeO(OH)@75}^\circ\text{C}$ | 7.3               |
| $\alpha\text{-FeO(OH)@RT}$               | 9.1               |
| $\alpha\text{-FeO(OH)@50}^\circ\text{C}$ | 7.2               |
| $\alpha\text{-FeO(OH)@85}^\circ\text{C}$ | 6.1               |



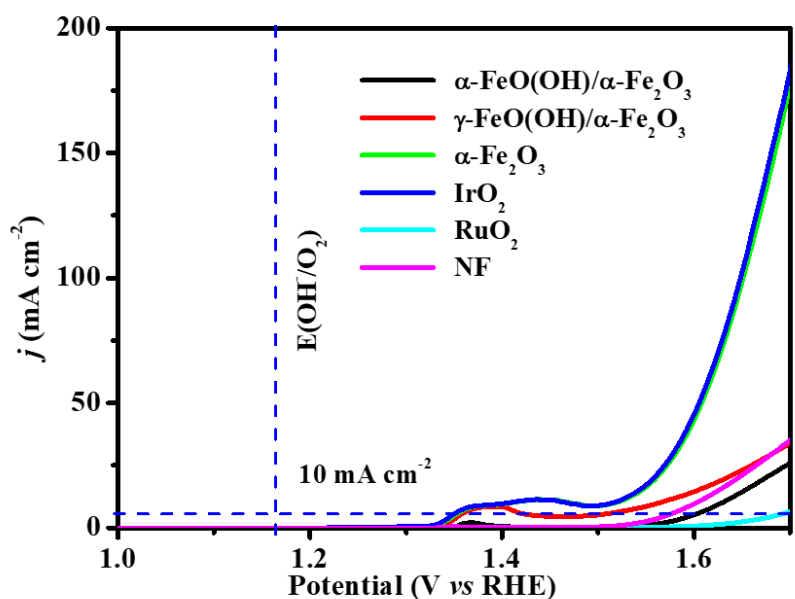

**Figure S13.** Linear sweep voltammetry of  $\alpha$ - $\text{Fe}_2\text{O}_3$  and mixed phase  $\alpha$ - $\text{FeO}(\text{OH})/\alpha$ - $\text{Fe}_2\text{O}_3$  and  $\gamma$ - $\text{FeO}(\text{OH})/\alpha$ - $\text{Fe}_2\text{O}_3$  materials in comparison to  $\text{RuO}_2$  and  $\text{IrO}_2$ .

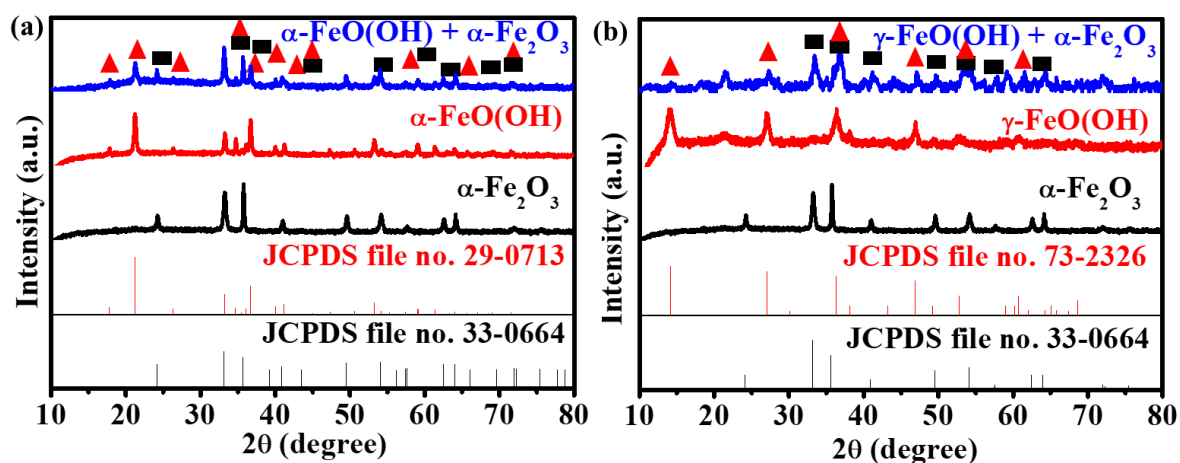

**Figure S14.** Powder X-ray diffraction spectra of (a)  $\alpha$ - $\text{FeO}(\text{OH})/\alpha$ - $\text{Fe}_2\text{O}_3$  (b)  $\gamma$ - $\text{FeO}(\text{OH})/\alpha$ - $\text{Fe}_2\text{O}_3$  along with the indexing of peaks with reference to the JCPDS cards.

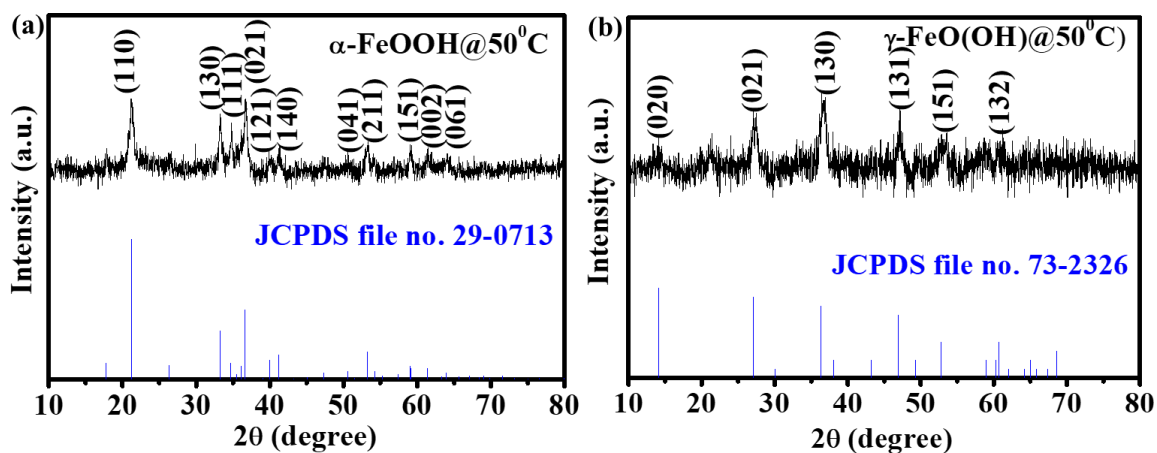

**Figure S15.** Powder X-ray diffraction spectra of partially crystalline (a)  $\alpha$ -FeO(OH)@50°C and (b)  $\gamma$ -FeO(OH)@50°C.

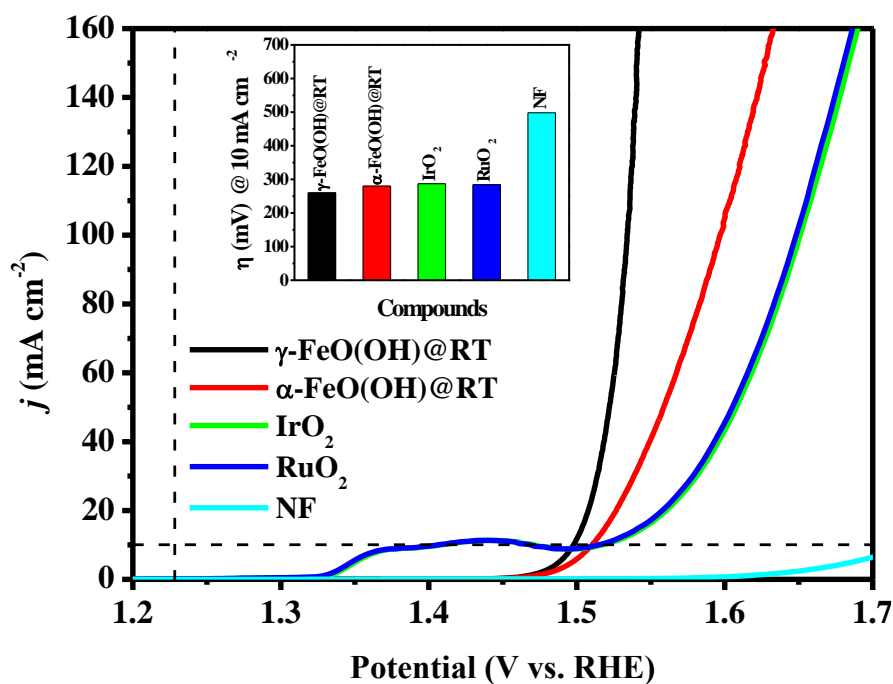

**Figure S16.** Polarization curves recorded with the working electrodes prepared with  $\gamma$ -FeO(OH)@RT,  $\alpha$ -FeO(OH)@RT, IrO<sub>2</sub>, RuO<sub>2</sub> deposited on 1 cm<sup>2</sup> NF surface and bare NF using 1 M KOH solution and in a sweep rate of 1 mV s<sup>-1</sup>. (Inset) Overpotential calculated from the LSV plots of  $\gamma$ -FeO(OH)@RT,  $\alpha$ -FeO(OH)@RT, IrO<sub>2</sub>, RuO<sub>2</sub>, and bare NF at a current density of 10 mA cm<sup>-2</sup>.

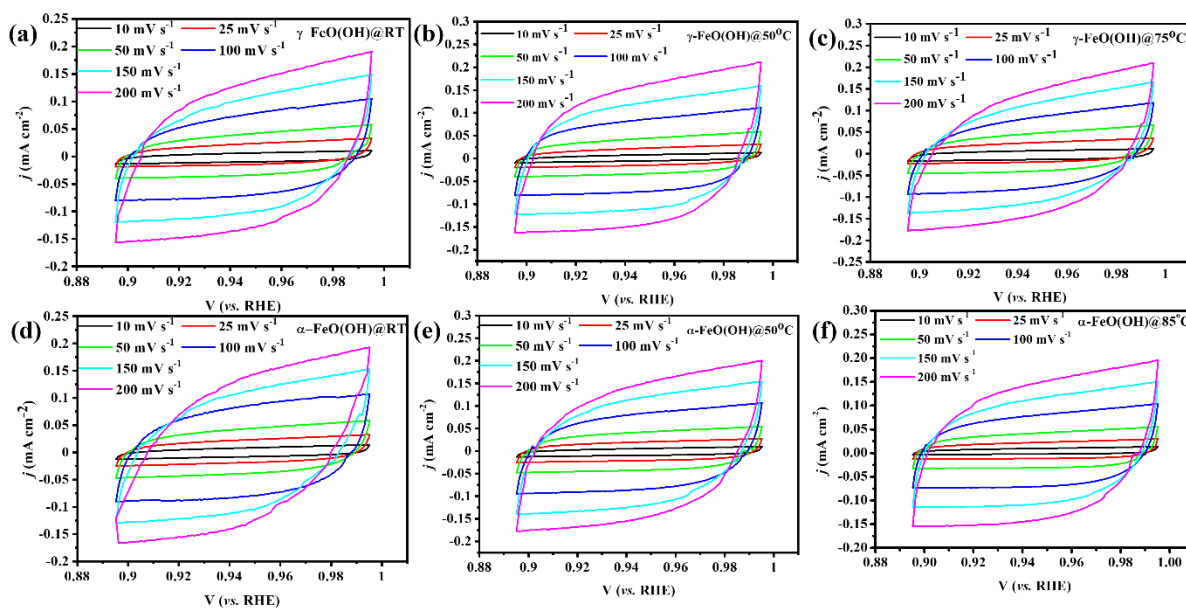

**Figure S17.** The ECSA plot used to determine the double-layer capacitance ( $C_{dl}$ ) of different catalysts. CV scans in the non-Faradaic potential range (-0.05 – 0.05V) at scan rates of 10  $\text{mV s}^{-1}$ , 25  $\text{mV s}^{-1}$ , 50  $\text{mV s}^{-1}$ , 100  $\text{mV s}^{-1}$ , 150  $\text{mV s}^{-1}$  and 200  $\text{mV s}^{-1}$ . The ECSA plots of (a)  $\gamma\text{-FeO(OH)@RT}$  (b)  $\gamma\text{-FeO(OH)@50}^\circ\text{C}$  (c)  $\gamma\text{-FeO(OH)@75}^\circ\text{C}$  (d)  $\alpha\text{-FeO(OH)@RT}$  (e)  $\alpha\text{-FeO(OH)@50}^\circ\text{C}$  (f)  $\alpha\text{-FeO(OH)@85}^\circ\text{C}$ .

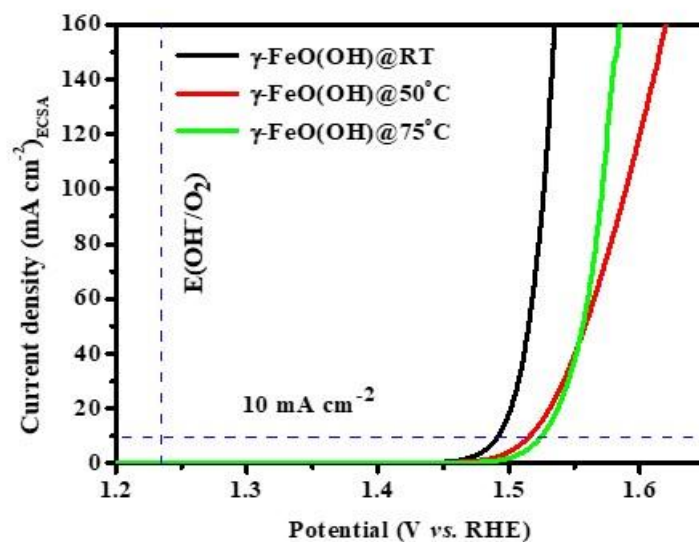

**Figure S18.** ECSA normalized activity of  $\gamma\text{-FeO(OH)@RT}$ ,  $\gamma\text{-FeO(OH)@50}^\circ\text{C}$ ,  $\gamma\text{-FeO(OH)@75}^\circ\text{C}$ .

**Table S3.** Comparison of TOF of,  $\gamma$ -FeO(OH)@RT  $\gamma$ -FeO(OH)@50°C  $\gamma$ -FeO(OH)@85°C,  $\alpha$ -FeO(OH)@RT,  $\alpha$ -FeO(OH)@50°C, and  $\alpha$ -FeO(OH)@85°C.

| Material               | Turn over frequency                   |
|------------------------|---------------------------------------|
| $\gamma$ -FeO(OH)@RT   | $1.6 \times 10^{-3} \text{ s}^{-1}$   |
| $\gamma$ -FeO(OH)@50°C | $0.59 \times 10^{-3} \text{ s}^{-1}$  |
| $\gamma$ -FeO(OH)@75°C | $0.3 \times 10^{-3} \text{ s}^{-1}$   |
| $\alpha$ -FeO(OH)@RT   | $0.845 \times 10^{-3} \text{ s}^{-1}$ |
| $\alpha$ -FeO(OH)@50°C | $0.436 \times 10^{-3} \text{ s}^{-1}$ |
| $\alpha$ -FeO(OH)@85°C | $0.343 \times 10^{-3} \text{ s}^{-1}$ |

**Table S4.**  $R_s$  value obtained from the Nyquist plot (Figure 9a and 9b).

| Material               | $R_s$ ( $\Omega$ ) |
|------------------------|--------------------|
| $\gamma$ -FeO(OH)@RT   | $2.12 \pm 0.2$     |
| $\gamma$ -FeO(OH)@50°C | $1.96 \pm 0.3$     |
| $\gamma$ -FeO(OH)@75°C | $2.21 \pm 0.2$     |
| $\alpha$ -FeO(OH)@RT   | $2.13 \pm 0.1$     |
| $\alpha$ -FeO(OH)@50°C | $2.01 \pm 0.2$     |
| $\alpha$ -FeO(OH)@85°C | $2.53 \pm 0.2$     |

#### Reference:

- (1) Zou, J.; Peleckis, G.; Lee, C.-Y.; Wallace, G. G. Facile Electrochemical Synthesis of Ultrathin Iron Oxyhydroxide Nanosheets for the Oxygen Evolution Reaction. *Chem. Commun.* **2019**, 55 (60), 8808–8811.
- (2) Babar, P. T.; Pawar, B. S.; Lokhande, A. C.; Gang, M. G.; Jang, J. S.; Suryawanshi, M. P.; Pawar, S. M.; Kim, J. H. Annealing Temperature Dependent Catalytic Water Oxidation Activity of Iron Oxyhydroxide Thin Films. *J. energy Chem.* **2017**, 26 (4), 757–761.
- (3) Niu, S.; Jiang, W.-J.; Wei, Z.; Tang, T.; Ma, J.; Hu, J.-S.; Wan, L.-J. Se-Doping Activates FeOOH for Cost-Effective and Efficient Electrochemical Water Oxidation. *J. Am. Chem. Soc.* **2019**, 141 (17), 7005–7013.
- (4) Bandal, H. A.; Jadhav, A. R.; Chaugule, A. A.; Chung, W. J.; Kim, H. Fe<sub>2</sub>O<sub>3</sub> Hollow Nanorods/CNT Composites as an Efficient Electrocatalyst for Oxygen Evolution Reaction. *Electrochim. Acta* **2016**, 222, 1316–1325.
- (5) Tavakkoli, M.; Kallio, T.; Reynaud, O.; Nasibulin, A. G.; Sainio, J.; Jiang, H.; Kauppinen, E.

- I.; Laasonen, K. Maghemite Nanoparticles Decorated on Carbon Nanotubes as Efficient Electrocatalysts for the Oxygen Evolution Reaction. *J. Mater. Chem. A* **2016**, *4* (14), 5216–5222.
- (6) Zhang, Y.; Jia, G.; Wang, H.; Ouyang, B.; Rawat, R. S.; Fan, H. J. Ultrathin CNTs@ FeOOH Nanoflake Core/Shell Networks as Efficient Electrocatalysts for the Oxygen Evolution Reaction. *Mater. Chem. Front.* **2017**, *1* (4), 709–715.
- (7) Lee, J.; Lee, H.; Lim, B. Chemical Transformation of Iron Alkoxide Nanosheets to FeOOH Nanoparticles for Highly Active and Stable Oxygen Evolution Electrocatalysts. *J. Ind. Eng. Chem.* **2018**, *58*, 100–104.
- (8) Zhang, C.; Zhang, B.; Li, Z.; Hao, J. Deep Eutectic Solvent-Mediated Hierarchically Structured Fe-Based Organic–Inorganic Hybrid Catalyst for Oxygen Evolution Reaction. *ACS Appl. Energy Mater.* **2019**, *2* (5), 3343–3351.
- (9) McCrory, C. C. L.; Jung, S.; Peters, J. C.; Jaramillo, T. F. Benchmarking Heterogeneous Electrocatalysts for the Oxygen Evolution Reaction. *J. Am. Chem. Soc.* **2013**, *135* (45), 16977–16987.
- (10) Zhang, X.; An, L.; Yin, J.; Xi, P.; Zheng, Z.; Du, Y. Effective Construction of High-Quality Iron Oxy-Hydroxides and Co-Doped Iron Oxy-Hydroxides Nanostructures: Towards the Promising Oxygen Evolution Reaction Application. *Sci. Rep.* **2017**, *7* (1), 1–10.
- (11) Zhang, X.; Zhang, B.; Liu, S.; Kang, H.; Kong, W.; Zhang, S.; Shen, Y.; Yang, B. RGO Modified Ni Doped FeOOH for Enhanced Electrochemical and Photoelectrochemical Water Oxidation. *Appl. Surf. Sci.* **2018**, *436*, 974–980.
- (12) Feng, J.; Ye, S.; Xu, H.; Tong, Y.; Li, G. Design and Synthesis of FeOOH/CeO<sub>2</sub> Heterolayered Nanotube Electrocatalysts for the Oxygen Evolution Reaction. *Adv. Mater.* **2016**, *28* (23), 4698–4703.
- (13) Zhu, K. Z.; Liu, C. B.; Ye, X. K.; Wu, Y. A Study of Catalysis of Copper-Aluminium Hydroxalate-like Compounds in the Phenol Hydroxylation. *Acta Chim. Sin.* **1998**, *56* (1), 36.
- (14) Chen, J.; Zheng, F.; Zhang, S.-J.; Fisher, A.; Zhou, Y.; Wang, Z.; Li, Y.; Xu, B.-B.; Li, J.-T.; Sun, S.-G. Interfacial Interaction between FeOOH and Ni–Fe LDH to Modulate the Local Electronic Structure for Enhanced OER Electrocatalysis. *ACS Catal.* **2018**, *8* (12), 11342–11351.
- (15) Li, X.; Kou, Z.; Xi, S.; Zang, W.; Yang, T.; Zhang, L.; Wang, J. Porous NiCo<sub>2</sub>S<sub>4</sub>/FeOOH

- Nanowire Arrays with Rich Sulfide/Hydroxide Interfaces Enable High OER Activity. *Nano Energy* **2020**, *78*, 105230.
- (16) Hu, J.; Li, S.; Chu, J.; Niu, S.; Wang, J.; Du, Y.; Li, Z.; Han, X.; Xu, P. Understanding the Phase-Induced Electrocatalytic Oxygen Evolution Reaction Activity on FeOOH Nanostructures. *ACS Catal.* **2019**, *9* (12), 10705–10711.
- (17) Li, H.; Zhou, Q.; Liu, F.; Zhang, W.; Tan, Z.; Zhou, H.; Huang, Z.; Jiao, S.; Kuang, Y. Biomimetic Design of Ultrathin Edge-Riched FeOOH@ Carbon Nanotubes as High-Efficiency Electrocatalysts for Water Splitting. *Appl. Catal. B Environ.* **2019**, *255*, 117755.
- (18) Feng, J.; Xu, H.; Dong, Y.; Ye, S.; Tong, Y.; Li, G. FeOOH/Co/FeOOH Hybrid Nanotube Arrays as High-performance Electrocatalysts for the Oxygen Evolution Reaction. *Angew. Chemie Int. Ed.* **2016**, *55* (11), 3694–3698.
- (19) Wang, K.; Du, H.; He, S.; Liu, L.; Yang, K.; Sun, J.; Liu, Y.; Du, Z.; Xie, L.; Ai, W. Kinetically Controlled, Scalable Synthesis of  $\Gamma$ -FeOOH Nanosheet Arrays on Nickel Foam toward Efficient Oxygen Evolution: The Key Role of In-situ-generated  $\Gamma$ -NiOOH. *Adv. Mater.* **2021**, *33* (11), 2005587.
- (20) Chakraborty, B.; Beltrán-Suito, R.; Hausmann, J. N.; Garai, S.; Driess, M.; Menezes, P. W. Enabling Iron-Based Highly Effective Electrochemical Water-Splitting and Selective Oxygenation of Organic Substrates through In Situ Surface Modification of Intermetallic Iron Stannide Precatalyst. *Adv. Energy Mater.* **2020**, *10* (30), 2001377.
- (21) Guan, J.; Li, C.; Zhao, J.; Yang, Y.; Zhou, W.; Wang, Y.; Li, G.-R. FeOOH-Enhanced Bifunctionality in Ni<sub>3</sub>N Nanotube Arrays for Water Splitting. *Appl. Catal. B Environ.* **2020**, *269*, 118600.
- (22) Liu, B.; Wang, Y.; Peng, H.; Yang, R.; Jiang, Z.; Zhou, X.; Lee, C.; Zhao, H.; Zhang, W. Iron Vacancies Induced Bifunctionality in Ultrathin Feroxyhyte Nanosheets for Overall Water Splitting. *Adv. Mater.* **2018**, *30* (36), 1803144.
- (23) Chen, G.-F.; Luo, Y.; Ding, L.-X.; Wang, H. Low-Voltage Electrolytic Hydrogen Production Derived from Efficient Water and Ethanol Oxidation on Fluorine-Modified FeOOH Anode. *ACS Catal.* **2018**, *8* (1), 526–530.
